# Supplementary material
Source: publisher figshare collection journal article supplement (https://acs.figshare.com/ndownloader/files/10875491)
Supplement: Supplementary file 1 [file 10875491]

## Supporting Information

for

### **A Fluorescent Probe for Stimulated Emission Depletion Super-Resolution Imaging of Vicinal-Dithiol-Proteins on Mitochondrial Membrane**

Zhigang Yang,<sup>†,‡,§</sup> Dong Hoon Kang,<sup>¶,§</sup> Hoyeon Lee,<sup>#,§</sup> Wei Yan,<sup>†</sup> Bhowmira Rathore,<sup>†</sup> Hye-Ri Kim,<sup>#</sup> Seo Jin Kim,<sup>#</sup> Hardev Singh,<sup>‡</sup> Jinwoo Shin,<sup>‡</sup> Liwei Liu,<sup>†</sup> Junle Qu,<sup>†,\*</sup> Chulhun Kang,<sup>#,\*</sup> and Jong Seung Kim<sup>†,‡,\*</sup>

<sup>†</sup>Key Laboratory of Optoelectronic Devices and Systems of Ministry of Education and Guangdong Province, College of Optoelectronic Engineering, Shenzhen University, Shenzhen, 518060, China.

<sup>‡</sup>Department of Chemistry, Korea University, Seoul 02841, Korea.

<sup>¶</sup>Department of Life Science and Research Center for Cell Homeostasis, Ewha Womans University, Seoul 03760, Korea.

<sup>#</sup>The School of East-West Medical Science, Kyung Hee University, Yongin 17104, Korea.

<sup>§</sup>These authors contributed equally to this work.

E-mail: jlqu@szu.edu.cn (Junle Qu); kangch@khu.ac.kr (Chulhun Kang); jongskim@korea.ac.kr (J.S. Kim)

## Materials and methods for the synthesis.

All chemicals were purchased from the companies, such as Sigma-Aldrich, TCI and Aladdin (China) etc. The HeLa cells were bought from the American Type Culture Collection (ATCC) (VA, USA). All chemicals including cell culturing, MitoTracker Deep Red FM, ER-Tracker Red (BODIPY TR Glibenclamide) and LysoTracker Red DND-99 were supplied by Invitrogen (Oregon, USA). And methanol, dithiothreitol (DTT), 1, 1, 1, 3, 3, 3-hexafluoro-2-propanol (HFIP) and Tris (2-carboxyethyl) phosphine hydrochloride (TCEP) from Sigma-Aldrich were directly used as received without further purification. Amyloid  $\beta$ -Protein (1-42) was purchased from Bachem, Antibodis, Lamin B (H-90) and  $\beta$ -Actin (C4) were bought from Santa Cruz Biotechnology (Santa Cruz, US). And anti-VDAC1 and VDAC2 were provided by Cambridge, UK (Abcam). Sequencing-grade trypsin was obtained from Promega (Wisconsin, US).

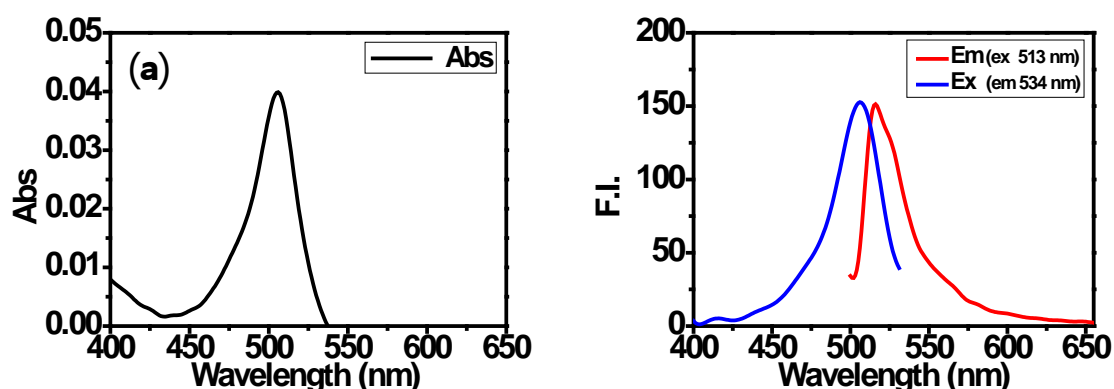

**Figure S1.** Absorption (a), fluorescence (red in b) and excitation (blue in b) spectra of **2** (1  $\mu$ M) in methanol. The emission was excited at 534 nm and the excitation spectrum was obtained with emission at 514 nm.

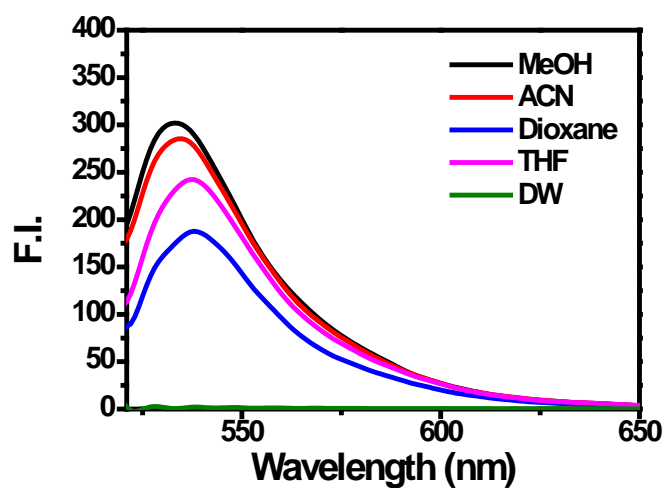

**Figure S2.** The emission spectra of **1** (1  $\mu\text{M}$ ) in different solvents such as acetonitrile (ACN), dioxane and de-ionized water (DW); Excitation wavelength was 514 nm.

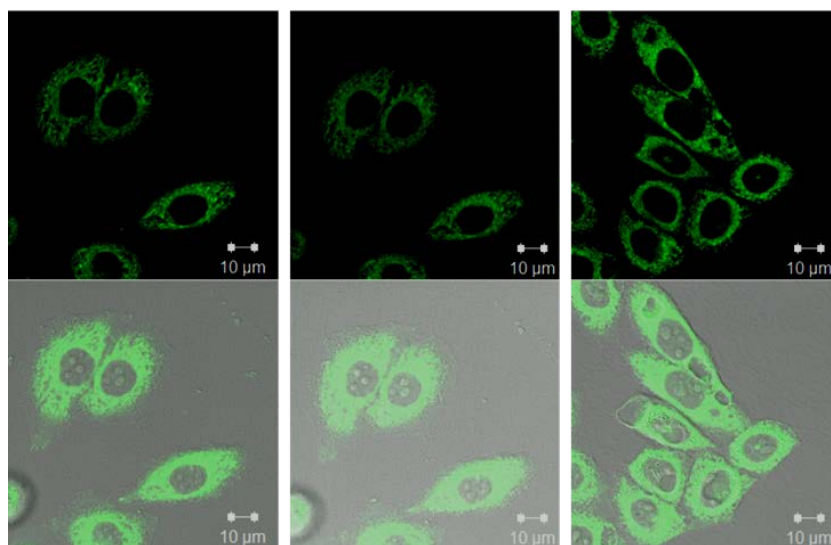

**Figure S3.** The confocal microscopic images of **1**-treated HeLa cells before and after washing with PBS and 4% formaldehyde; the cells were treated with Probe **1** (1  $\mu$ M) for 1 h at 37 °C. After 1 $\times$ PBS washing, the cells were treated with 4% formaldehyde for 30 min at -20 °C. The images were obtained at 505 nm using long pass emission filters upon excitation at 488 nm.

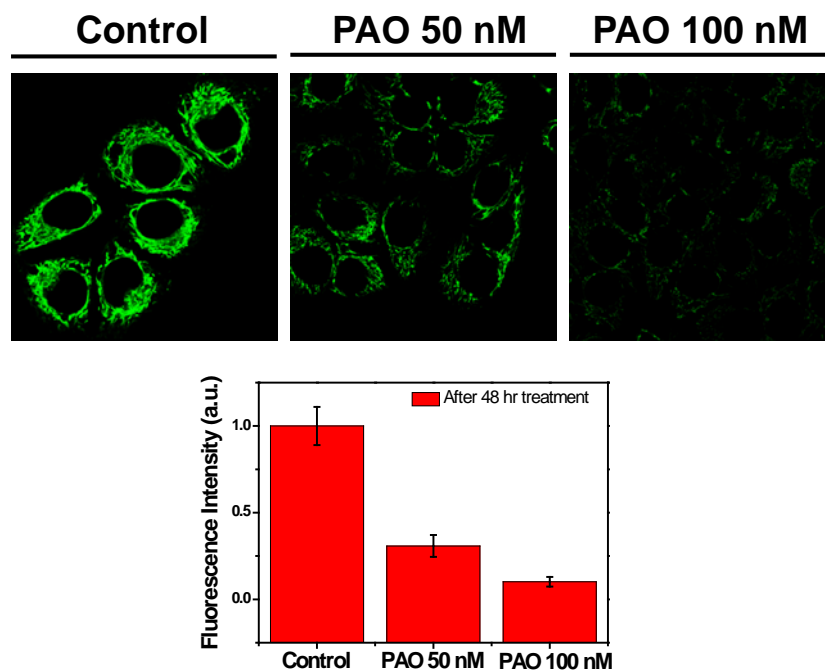

**Figure S4.** Fluorescence images of HeLa cells treated with Probe **1** (1  $\mu$ M) after 48 h the post treatment with PAO. The images were obtained following 505 nm long pass emission filter upon 488 nm excitation.

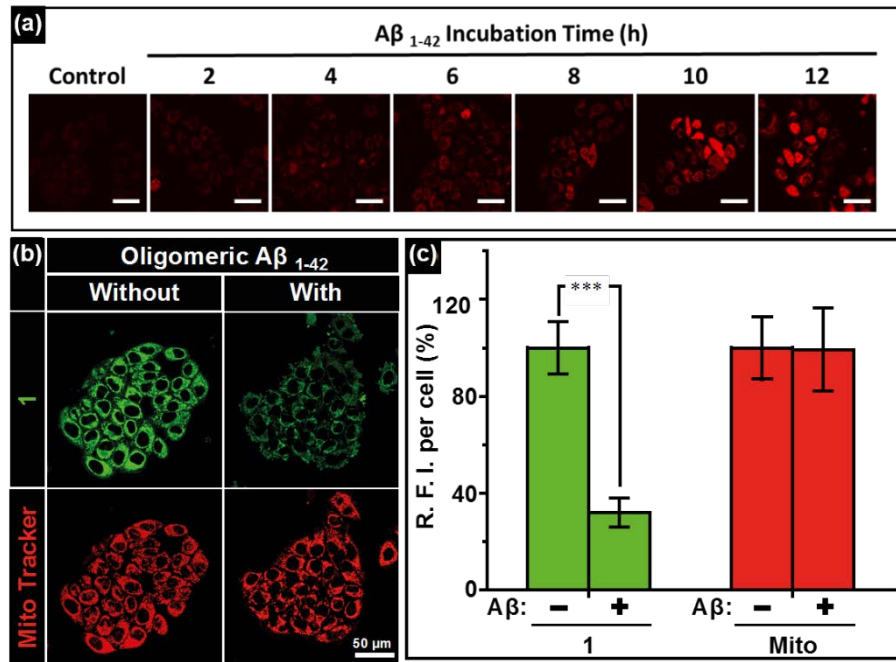

**Figure S5.** Confocal microscopic images of HeLa cells co-labelled with oligomeric Aβ<sub>1-42</sub> and (a mitochondrial damaging agent) MitoSOX (red emissive mitochondrial ROS indicator) as function of incubation time. Cells were seeded at 35 mm confocal dish. Cells were pretreated with oligomeric Aβ<sub>1-42</sub> (10.0 μM) for 2, 4, 6, 8, 10 and 12 h in incubator (37 °C, 5% CO<sub>2</sub>). After each time of incubation, cells were co-labelled with MitoSOX (2.0 μM) in 1×PBS for 20 min at 37 °C in dark. The fluorescent confocal images were collected using an excitation wavelength of 488 nm and a long-path 530 nm emission filter and compared with oligomeric Aβ<sub>1-42</sub> untreated control cells. Scale bar indicate 50 μm. (b) Fluorescent images of HeLa cells were obtained before and after 1×PBS washing followed by ethanol (1:1 ratio) and three rounds of 4% formaldehyde solution; (c) Histogram of relative fluorescence intensity (R. F. I.) per cell was represented using image J program. Results represent the mean (± SEM) of three independent experiments (n = 3). The statistical signification was marked as \*\*\* for  $p < 0.001$ , compared with each of the fluorescence intensity before washing.

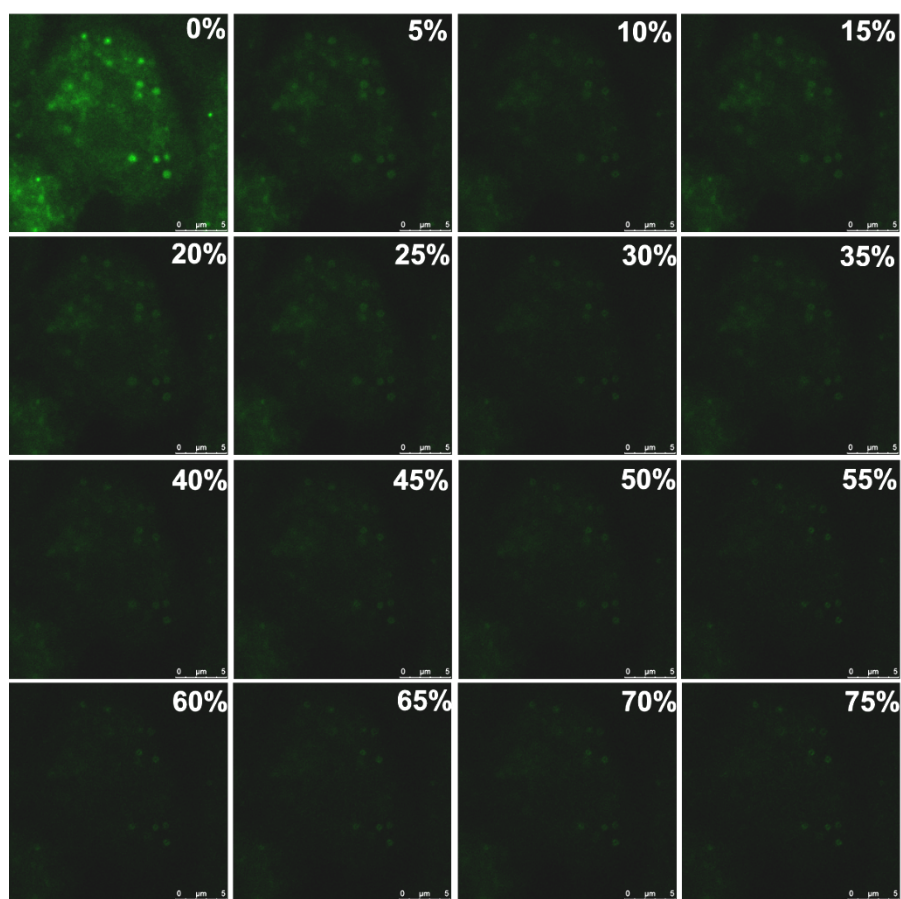

**Figure S6.** Fluorescent imaging of **1** (2  $\mu\text{M}$ ) in HeLa cells under the illumination of different STED laser power, excitation wavelength was 514 nm and STED laser wavelength was 592 nm, using a Leica SP8 suite microscopy system.

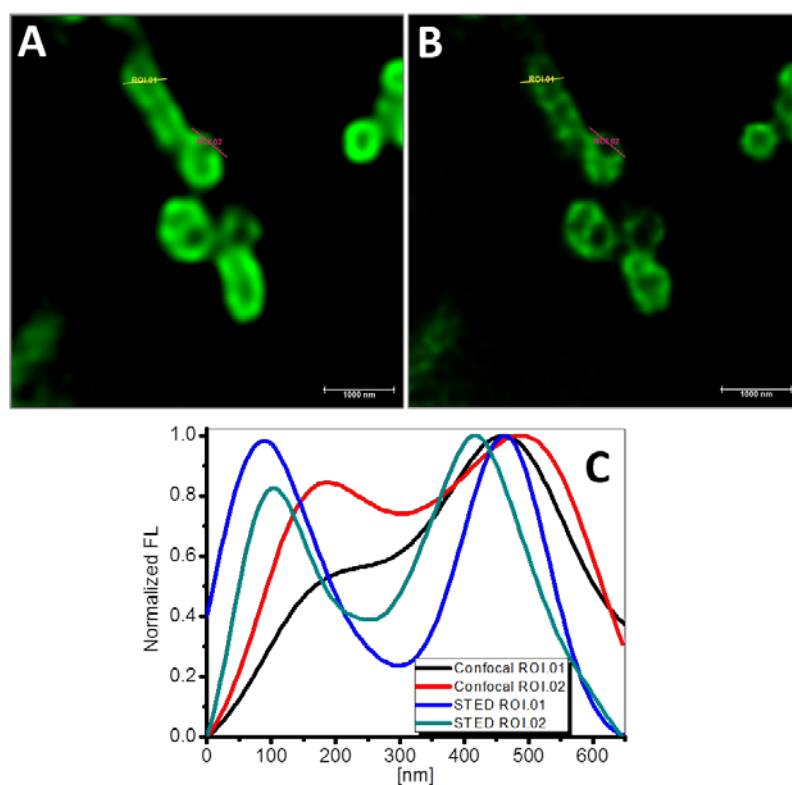

**Figure S7.** Magnified fluorescent imaging of mitochondria labelled by **1** (2  $\mu$ M), A) Confocal imaging; B) STED super resolution imaging; C) Line traces through the single mitochondrial segment show the markedly improved resolving power of STED super resolution imaging. The excitation wavelength was 514 nm, and STED wavelength was 592 nm with 10% of the CW laser power.

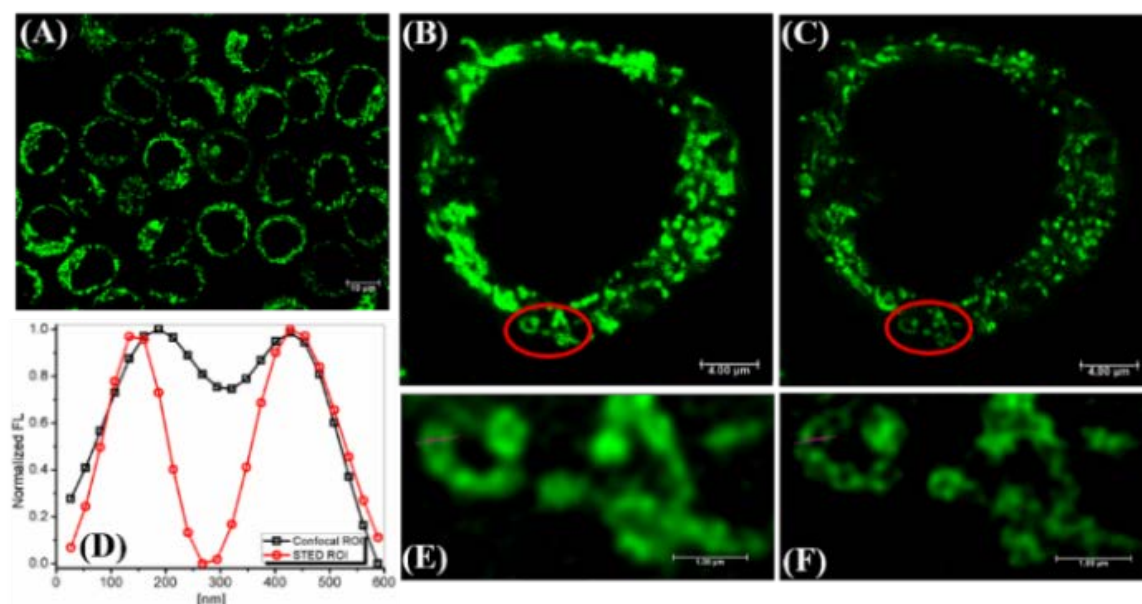

**Figure S8.** STED super resolution imaging of **1** (1  $\mu\text{M}$ ) in HeLa cells; (A) confocal fluorescence imaging; (B) confocal fluorescent imaging of a single cell; (C) STED super resolution imaging of a single HeLa cell; (D) Line traces through the single mitochondrial segment show the markedly improved resolving power of STED (Red); (E), (F) magnified images of confocal and STED super resolution fluorescent imaging in the ROI regions of B and C, respectively;



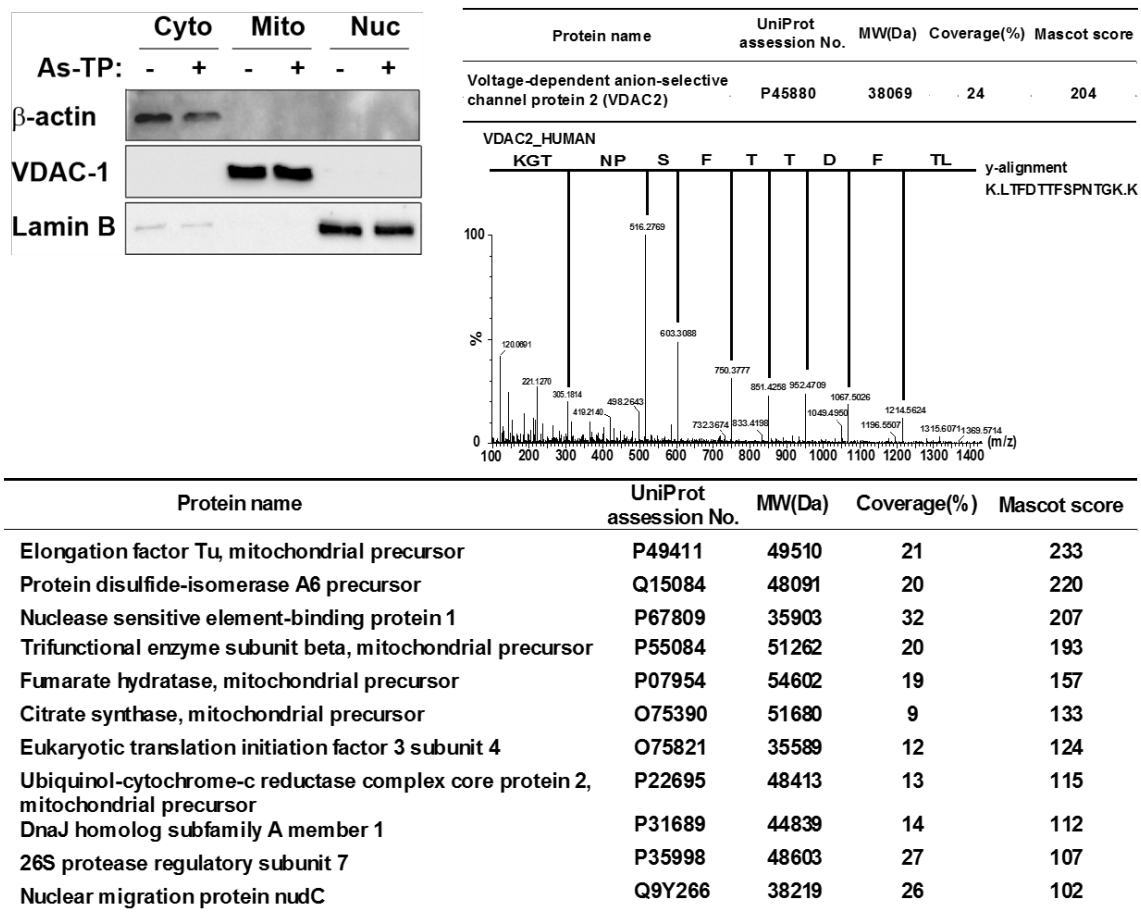

**Figure S9.** Western blots analysis for confirming the purity of organelle fractions using organelle-selective makers. The markers for cytosol, mitochondria and nucleus are  $\beta$ -actin, VDAC1 and lamin B, respectively; MS/MS spectra of  $[M+2H]^{2+}$  ions of the peptides derived from the protein band corresponding to VDAC2 are shown.

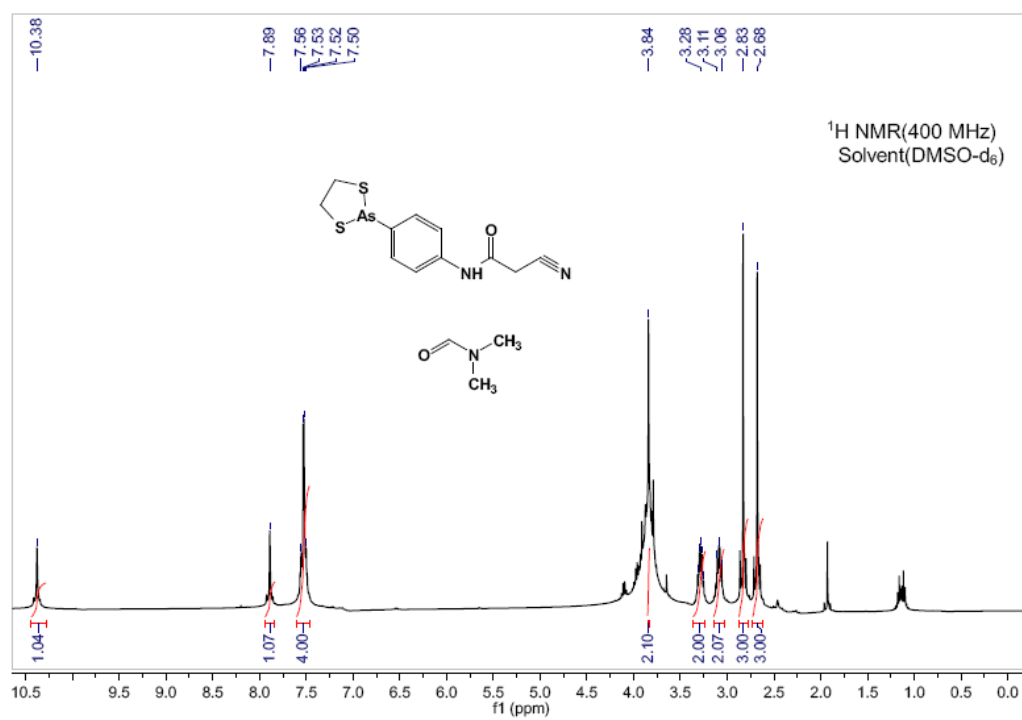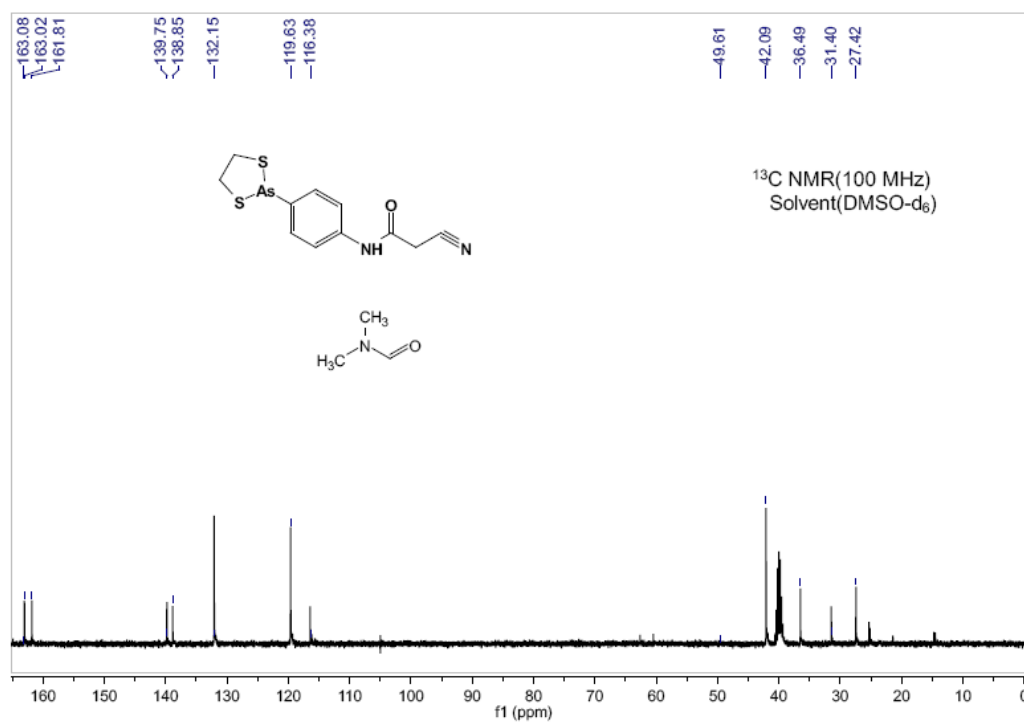

**Figure S10.** <sup>1</sup>H-<sup>13</sup>C NMR of **8**

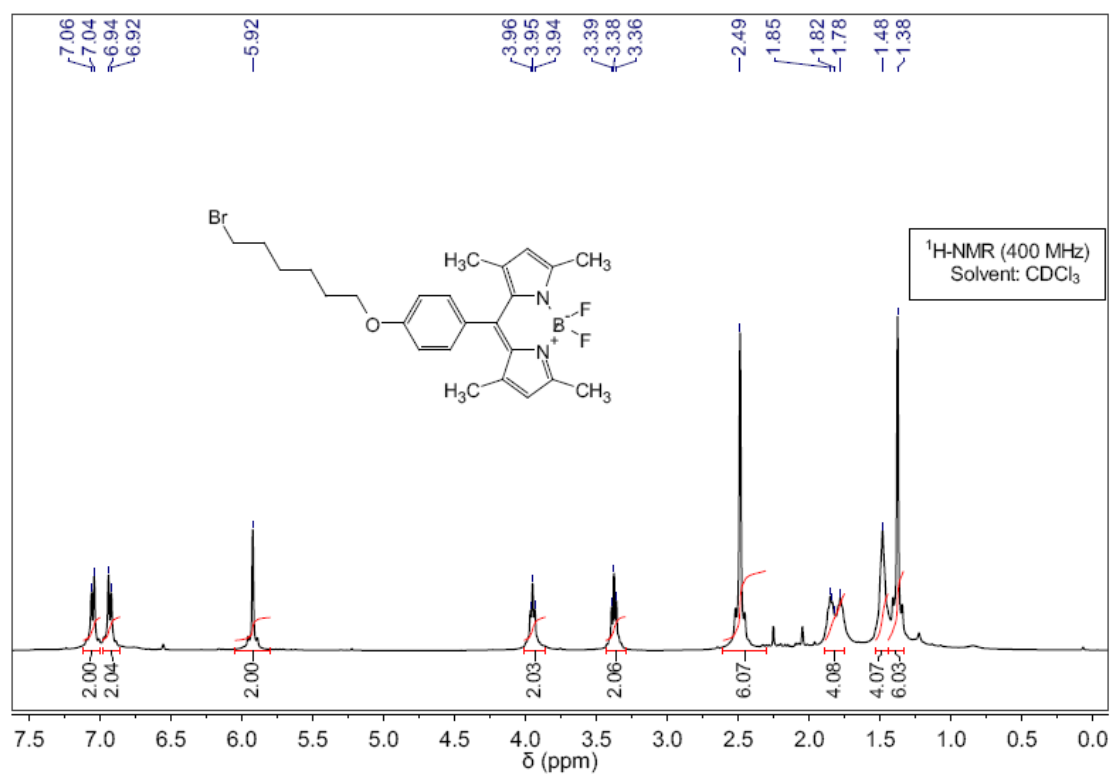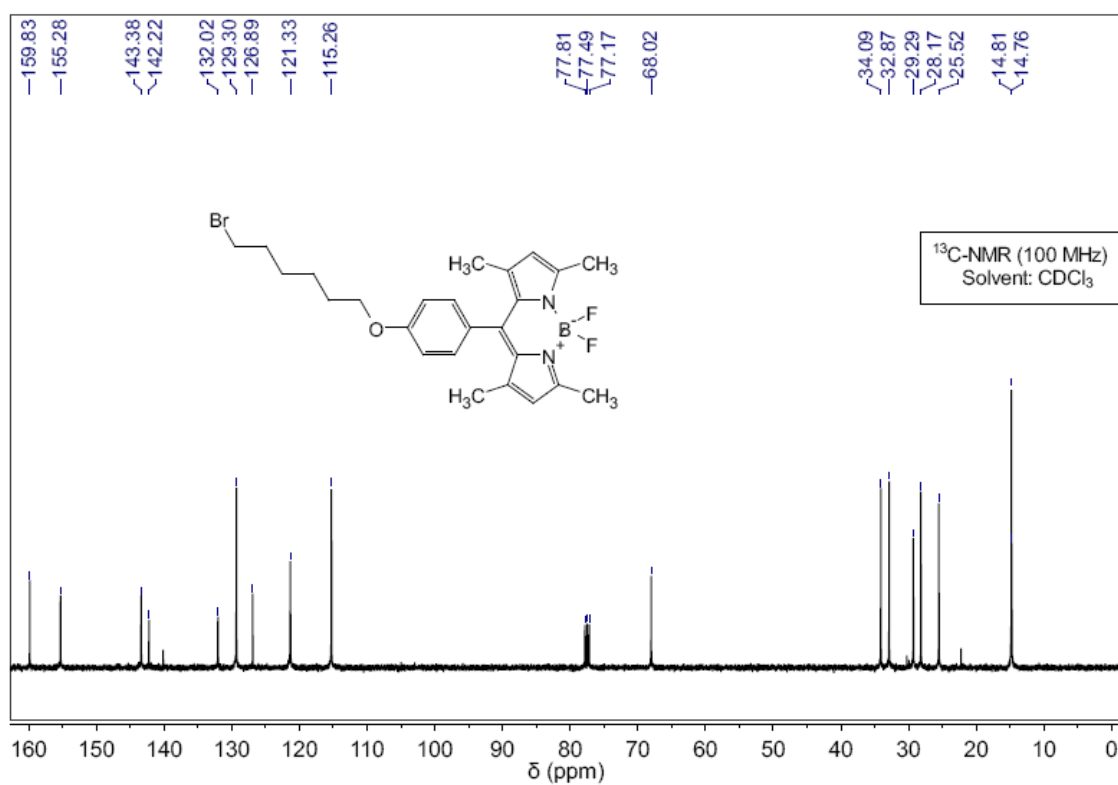

**Figure S11.** <sup>1</sup>H-<sup>13</sup>C NMR of **5**

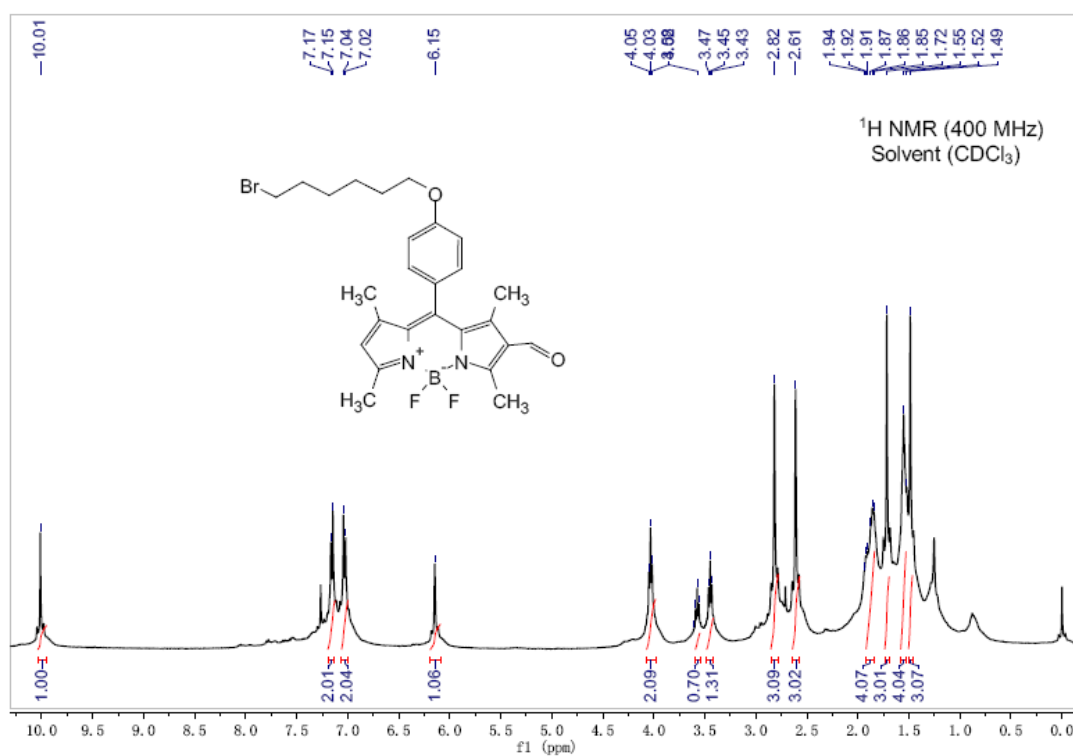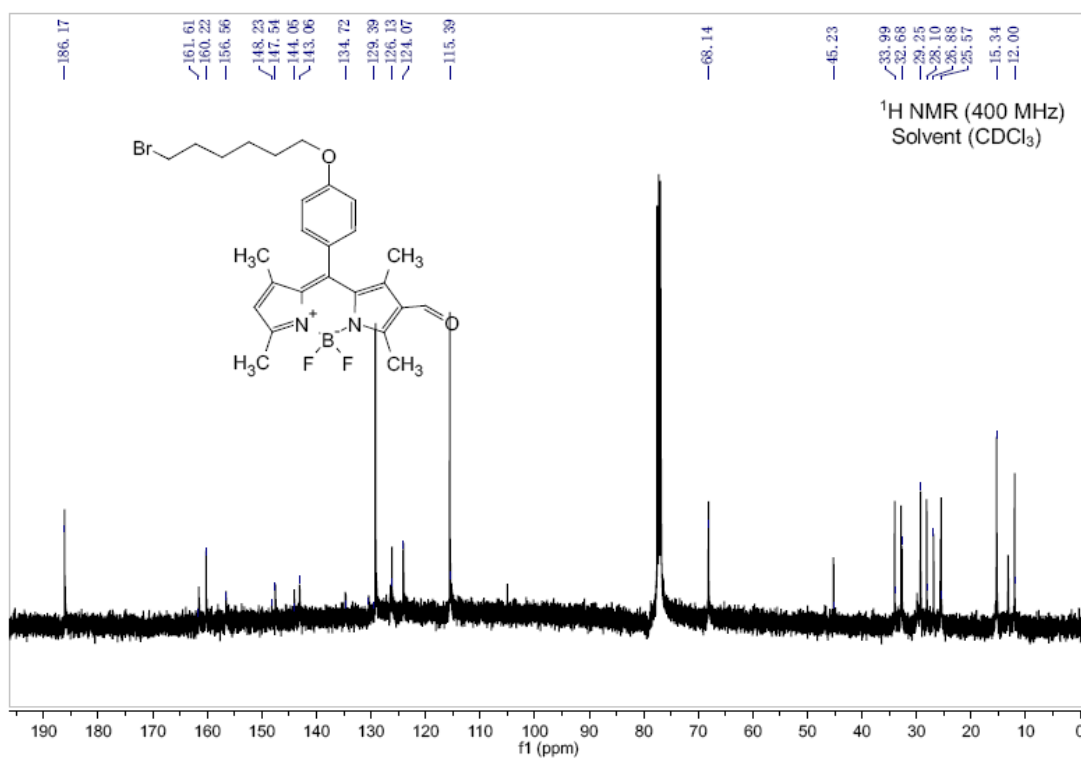

Figure S12. <sup>1</sup>H-<sup>13</sup>C NMR of 4

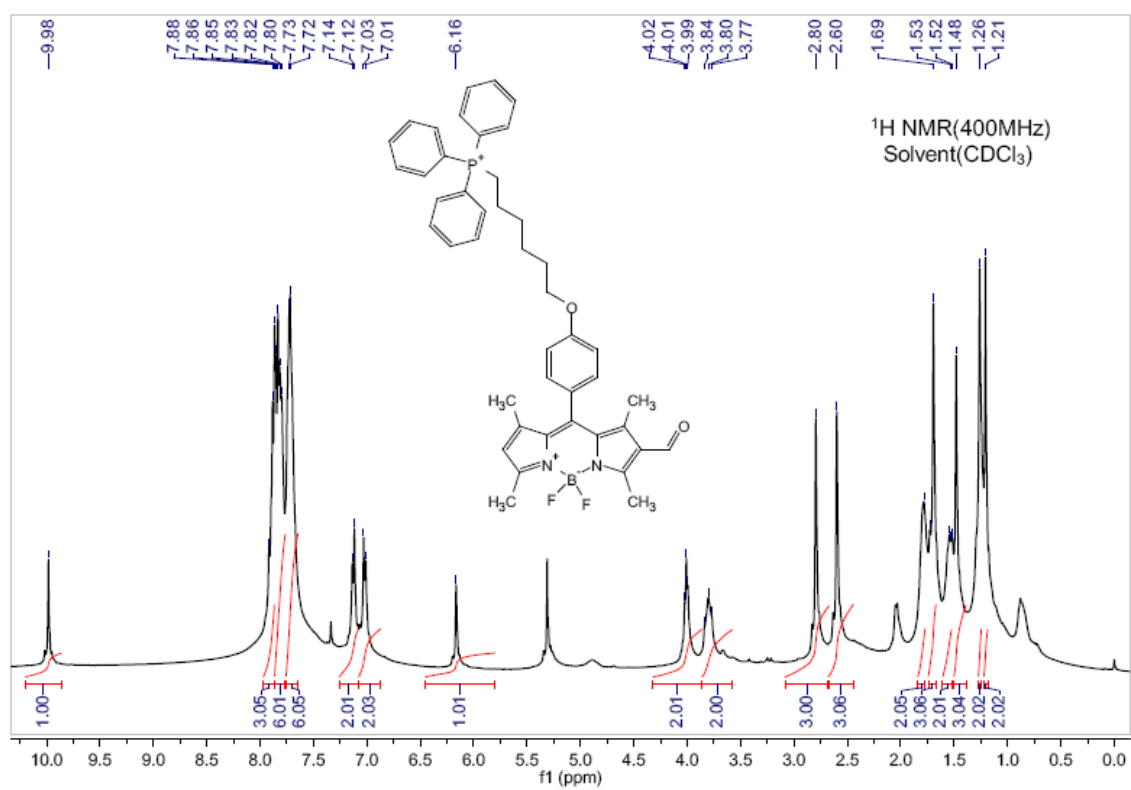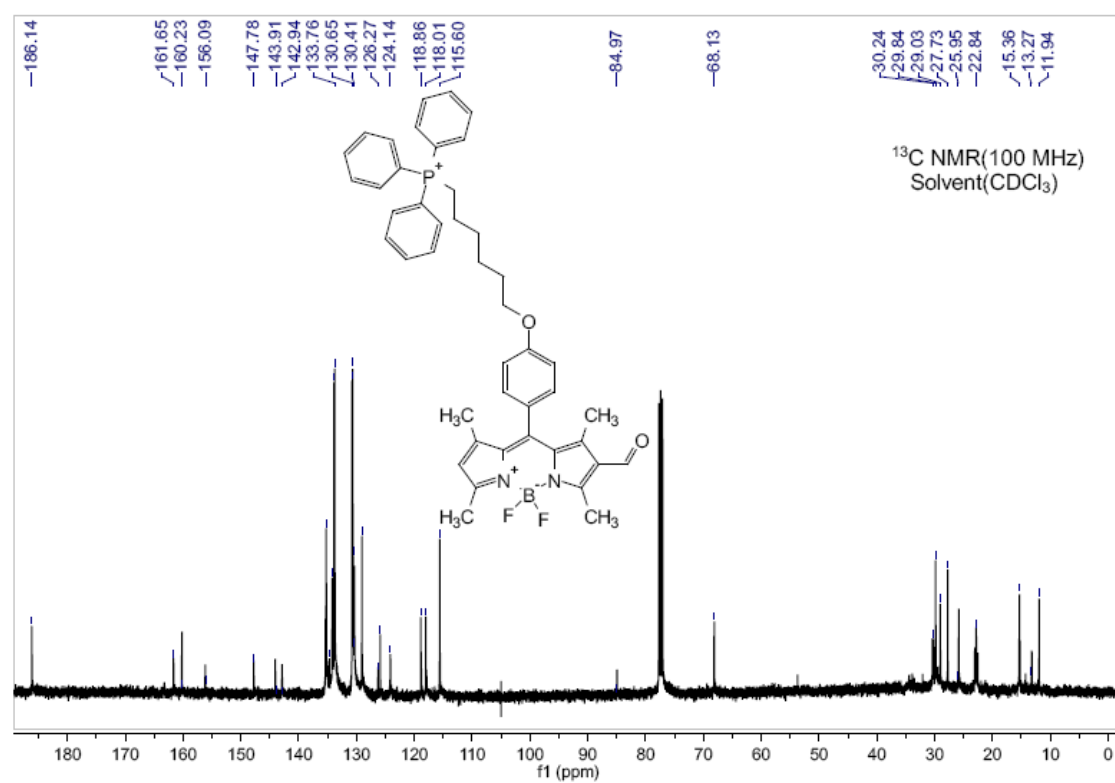

Figure S13. <sup>1</sup>H-<sup>13</sup>C NMR of 3

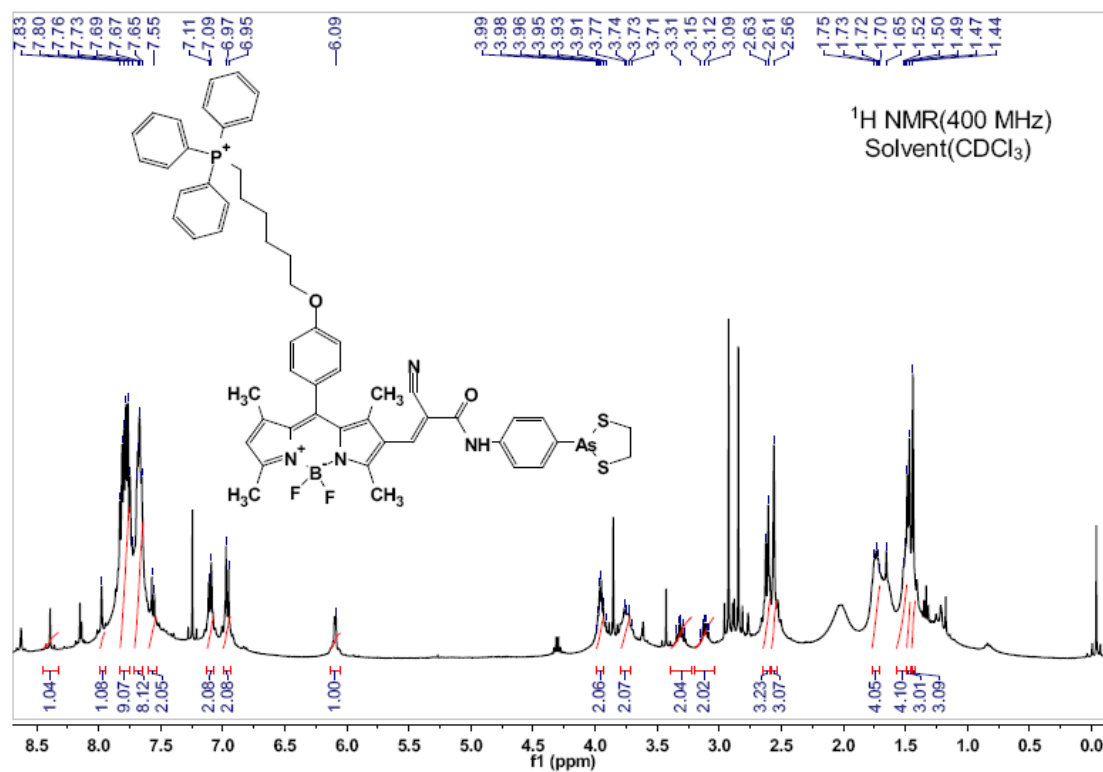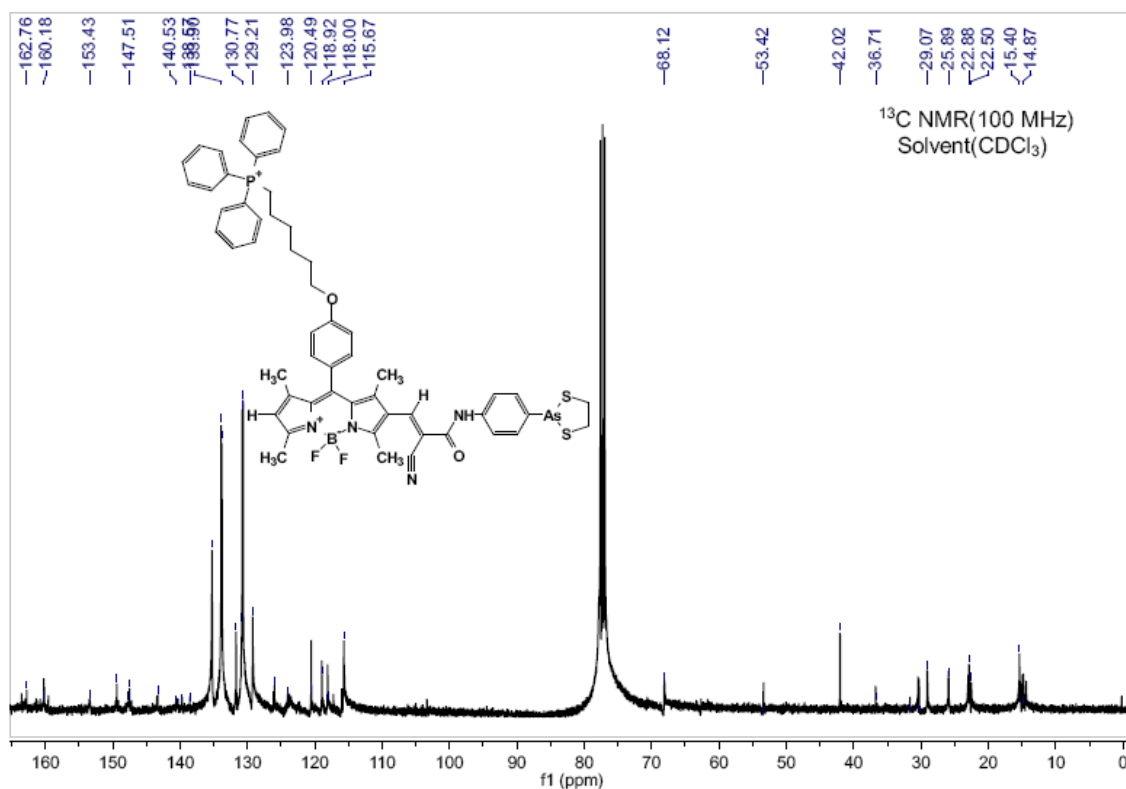

# <Spectrum>

Line#:1 R.Time:0.483(Scan#:59)  
 MassPeaks:729  
 RawMode:Single 0.483(59) BasePeak:1021.50(441960)  
 BG Mode:None Segment 1 - Event 1

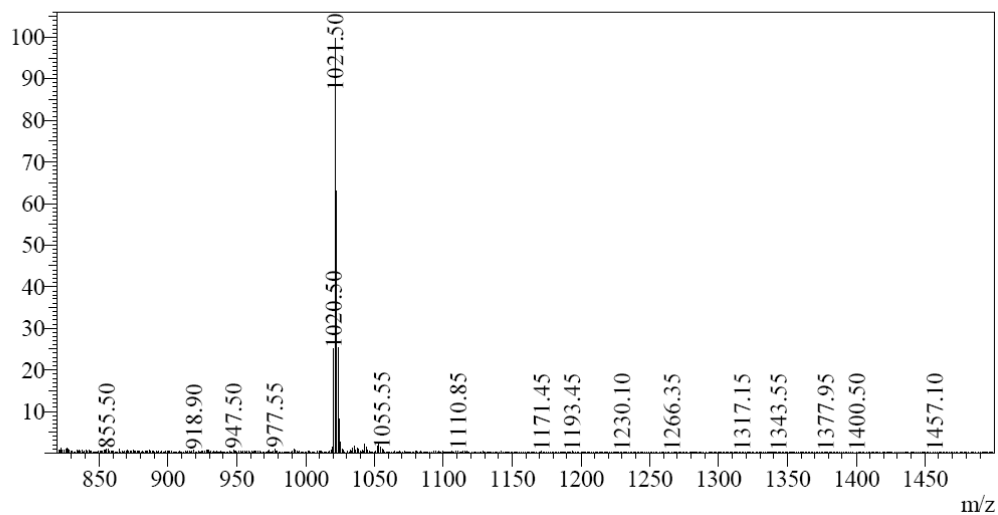

**Figure S14.**  $^1\text{H}$ - $^{13}\text{C}$  NMR and Mass spectra of **1**

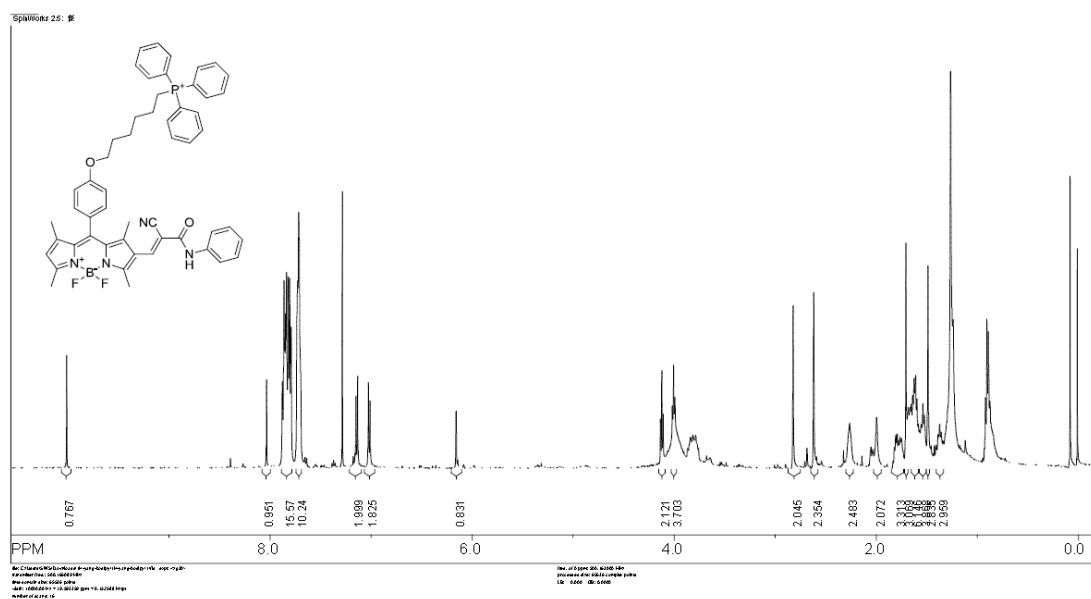

**Figure S15.**  $^1\text{H}$  NMR spectra of reference compound **2**
